# Supplementary material
Source: publisher site journal article supplement (https://www.spandidos-publications.com/4763/downloadSupplementary)
Supplement: Supplementary file 2 [file downloadSupplementary]

## Sheet: Sheet1
Data S2. Information for each sample.
Number	Sample	Sample name in Analysis Report	Group
1	Aqueous humor	N1	Control
2	Aqueous humor	N2	Control
3	Aqueous humor	N3	Control
4	Aqueous humor	T1	mild cataract
5	Aqueous humor	T2	mild cataract
6	Aqueous humor	T3	mild cataract
7	Aqueous humor	T4	mild cataract
8	Aqueous humor	T5	mild cataract
9	Aqueous humor	T6	mild cataract
10	Aqueous humor	T7	mild cataract
11	Aqueous humor	T8	mild cataract
12	Aqueous humor	T9	mild cataract
13	Aqueous humor	T10	mild cataract
14	Aqueous humor	TT1	severe cataract
15	Aqueous humor	TT2	severe cataract
16	Aqueous humor	TT3	severe cataract
17	Aqueous humor	TT4	severe cataract
18	Aqueous humor	TT5	severe cataract
19	Aqueous humor	TT6	severe cataract
20	Aqueous humor	TT7	severe cataract
21	Aqueous humor	TT8	severe cataract
22	Aqueous humor	TT9	severe cataract
23	Aqueous humor	TT10	severe cataract
